# Supplementary material
Source: PubMed Central journal article supplement (PMC4307447)
Supplement: ijcem0007-5010-f5.pdf [file ijcem0007-5010-f5.pdf]

## SOX2 and HNC prognosis

**Table S1.** Multivariate analysis for disease-free and overall survival in our included studies

| First author & publishing year   | Multivariable analysis | Case number           |                      | OS                  |       | DFS                 |       |
|----------------------------------|------------------------|-----------------------|----------------------|---------------------|-------|---------------------|-------|
|                                  |                        | high expression n (%) | low expression n (%) | HR (95% CI)         | P     | HR (95% CI)         | P     |
| Luo <i>et al.</i> 2013 (NPC)     | Yes                    | 43 (35.2%)            | 79 (64.8%)           | 1.072 (0.556-2.064) | 0.836 | NA                  | NA    |
| Ge <i>et al.</i> 2010 (HPC)      | Yes                    | 67 (78.8%)            | 18 (21.2%)           | 0.855 (0.477-1.532) | 0.599 | 1.239 (0.681-2.254) | 0.485 |
| Dai <i>et al.</i> 2014 (SACC)    | Yes                    | 82 (62.6%)            | 49 (37.4%)           | 2.65 (1.21-5.20)    | 0.035 | 2.57 (1.44-5.07)    | 0.042 |
| Du <i>et al.</i> 2011 (OTSCC)    | Yes                    | 51 (62.2%)            | 31 (37.8%)           | 2.94 (1.097-7.889)  | 0.032 | 3.8 (1.378-11.850)  | 0.011 |
| Tang <i>et al.</i> 2013 (LC)     | Yes                    | 66 (41.0%)            | 95 (59.0%)           | 1.911 (1.037-3.522) | 0.038 | NA                  | NA    |
| Wang <i>et al.</i> 2012 (NPC)    | NA                     | 29 (26.9%)            | 79 (73.1%)           | NA                  | NA    | NA                  | NA    |
| Márquez <i>et al.</i> 2013 (HPC) | NA                     | 39 (38.2%)            | 63 (61.8%)           | NA                  | NA    | NA                  | NA    |
| Márquez <i>et al.</i> 2013 (LC)  | NA                     | 28 (41.8%)            | 39 (58.2%)           | NA                  | NA    | NA                  | NA    |
| Márquez <i>et al.</i> 2013 (SNC) | NA                     | 7 (13.7%)             | 44 (86.3%)           | NA                  | NA    | NA                  | NA    |

## SOX2 and HNC prognosis

**Table S2.** Assessment of Newcastle-Ottawa Scale methodological quality of cohort studies

| Study                | Selection                                |                                 |                           | Comparability | Outcome                      |                       |                  | Score |                    |
|----------------------|------------------------------------------|---------------------------------|---------------------------|---------------|------------------------------|-----------------------|------------------|-------|--------------------|
|                      | Representativeness of the exposed cohort | Selection of non-exposed cohort | Ascertainment of exposure |               | Outcome not present at start | Assessment of outcome | Follow-up length |       | Follow-up adequacy |
| Dai et al. (SACC)    | ★                                        | ★                               | ★                         | ★             | ★★                           | ★                     | ★                | -     | 8                  |
| Du et al. (OTSCC)    | ★                                        | ★                               | ★                         | ★             | ★                            | ★                     | ★                | -     | 7                  |
| Ge et al. (HPC)      | ★                                        | ★                               | ★                         | ★             | ★                            | ★                     | ★                | -     | 7                  |
| Luo et al. (NPC)     | ★                                        | ★                               | ★                         | ★             | ★★                           | ★                     | ★                | ★     | 9                  |
| Márquez et al. (HPC) | ★                                        | ★                               | ★                         | ★             | ★★                           | -                     | ★                | ★     | 8                  |
| Márquez et al. (LC)  | ★                                        | ★                               | ★                         | ★             | ★★                           | -                     | ★                | ★     | 8                  |
| Márquez et al. (SNC) | ★                                        | ★                               | ★                         | ★             | ★★                           | -                     | ★                | ★     | 8                  |
| Tang et al. (LC)     | ★                                        | ★                               | ★                         | ★             | ★★                           | ★                     | ★                | -     | 8                  |
| Wang et al. (NPC)    | ★                                        | ★                               | ★                         | ★             | ★                            | -                     | ★                | -     | 6                  |

Newcastle-Ottawa Quality Assessment Scale: study can have 1 star (★) for meeting each criterion, except that comparability (design or analysis) can have a maximum of 2 stars. For comparability in this study: 1 star if controlled for Age, gender, grade, etc.; 2 stars if also controlled for other important variables such as recurrence or metastasis.

## SOX2 and HNC prognosis

**Table S3.** Main meta-analysis of association of SOX2 expression with clinicopathological indicators

| Clinicopathological Indicators | Cohorts | OR (95% CI)      | <i>P</i>  | Model  | Heterogeneity         |                         | Publication bias |                  |
|--------------------------------|---------|------------------|-----------|--------|-----------------------|-------------------------|------------------|------------------|
|                                |         |                  |           |        | <i>I</i> <sup>2</sup> | <i>P</i> <sub>het</sub> | Begg's <i>P</i>  | Egger's <i>P</i> |
| Tumor grade (T3-T4)            | 8       | 2.10 (1.20-3.68) | 0.01      | Random | 63%                   | 0.009                   | 0.174            | 0.177            |
| TNM stage (III-IV)             | 6       | 4.22 (2.62-6.80) | < 0.00001 | Fixed  | 23%                   | 0.26                    | 0.707            | 0.341            |
| Histological grade (poor)      | 7       | 0.97 (0.51-1.85) | 0.92      | Random | 44%                   | 0.09                    | 0.784            | 0.581            |
| Lymph node metastasis          | 6       | 2.25 (1.50-3.35) | < 0.0001  | Fixed  | 17%                   | 0.30                    | 0.707            | 0.108            |
| Distant metastasis             | 4       | 2.09 (1.31-3.34) | 0.002     | Fixed  | 36%                   | 0.21                    | 0.734            | 0.348            |
| Local recurrence               | 4       | 0.62 (0.29-1.36) | 0.24      | Fixed  | 42%                   | 0.16                    | 1.000            | 0.541            |
